# Supplementary material
Source: HighWire-hosted journal article supplement (https://gut.bmj.com/content/67/7/1239)
Supplement: inline-supplementary-material-2 [file inline-supplementary-material-2.pdf]

**Supplementary Table 2.** Anti-*H. pylori* treatment at baseline and infection status of individuals who developed gastric cancer, during 16 years of follow-up

| Subject number | Anti- <i>H. pylori</i> treatment at baseline | GC diagnosis (years after baseline) | <i>H. pylori</i> status*<br>(years after baseline) |       |       |       |
|----------------|----------------------------------------------|-------------------------------------|----------------------------------------------------|-------|-------|-------|
|                |                                              |                                     | 3                                                  | 6     | 12    | 16    |
|                |                                              |                                     | years                                              | years | years | years |
| 1              | No                                           | 2                                   |                                                    |       |       |       |
| 2              | Yes                                          | 2                                   |                                                    |       |       |       |
| 3              | Yes                                          | 3                                   | +                                                  |       |       |       |
| 4              | No                                           | 3                                   | +                                                  |       |       |       |
| 5              | No                                           | 6                                   | +                                                  | -     |       |       |
| 6              | Yes                                          | 10                                  | -                                                  | -     |       |       |
| 7              | Yes                                          | 10                                  | -                                                  | -     |       |       |
| 8              | Yes                                          | 12                                  | +                                                  | -     | +     |       |
| 9              | No                                           | 12                                  | +                                                  |       | +     |       |
| 10             | No                                           | 16                                  | +                                                  | -     | -     | -     |

GC, gastric cancer

\*With the exception of subject number 2, all subjects who developed GC were *H. pylori*-positive at baseline.
